# Supplementary material for: Supplementation with Lactobacillus helveticus NS8 alleviated behavioral, neural, endocrine, and microbiota abnormalities in an endogenous rat model of depression
Source: Front Immunol. 2024 Sep 13;15:1407620. doi: 10.3389/fimmu.2024.1407620 (PMC11428200; doi:10.3389/fimmu.2024.1407620)
Supplement: Supplementary Table 1 — Sensitivity of the ELISA kits. [file Table1.xlsx]

## Sheet: ELISA kits' sensitivity
Table 1. Sensitivity of the ELISA kits.
ELISA kits	Sensitivity
brain-derived neurotrophic factor (BDNF)	0.312 ng/mL
glucocorticoid receptor (GR)	15.6 pg/mL
Corticotropin releasing hormone (CRH)	1.25 ng/mL
corticosterone (CORT)	30 ng/mL
adrenocorticotropic Hormone (ACTH)	5 pg/mL
serotonin (5-hydroxytryptamine, 5-HT)	0.8 ng/mL
5-hydroxyindoleacetic acid (5-HIAA)	25 ng/mL
tryptophan hydroxylase 2 (TPH2)	31.25 pg/mL
indoleamine 2, 3-dioxygenase 1 (IDO1)	31.25 pg/mL
dopamine (DA)	0.156 ng/mL
norepinephrine (NE)	0.49 pg/mL
4-hydroxy-3-methoxyphenylacetic acid (homovanillic acid, HVA)	0.049 ng/mL
tyrosine hydroxylase (TH)	78 pg/mL
substance P (SP)	6.25 pg/mL
gamma-aminobutyric acid (GABA)	0.5 umol/L
glutamic acid (GLU)	3 ug/mL
interleukin-17a (IL-17a)	93.75 pg/mL
interleukin-10 (IL-10)	3.12 pg/mL
interleukin-6 (IL-6)	10 pg/mL
interleukin-1β (IL-1β)	5 pg/mL
tumor necrosis factor-alpha (TNF-α)	20 pg/mL
transforming growth factor-beta (TGF-β)	15 pg/mL
interferon-gamma (IFN-γ)	40 pg/mL
lipopolysaccharide (LPS)	0.156 ng/mL

## Sheet: RT-RCR primers
Table 2. Primer sequences for RT-PCR.
mRNA targets	Descriptions (Gene ID)	Forward	Reverse
TNF-α	tumor necrosis factor-alpha (24835)	AAAGGACACCATGAGCACGGAAAG	CGCCACGAGCAGGAATGAGAAG
IL-6	Interleukin 6 (24498)	ACTTCCAGCCAGTTGCCTTCTTG	TGGTCTGTTGTGGGTGGTATCCTC
IL-1β	Interleukin 1 beta (24494)	CTCACAGCAGCATCTCGACAAGAG	TCCACGGGCAAGACATAGGTAGC
IL-17a	Interleukin 17A (301289)	CTGTTGCTGCTACTGAACCTGGAG	CCTCGGCGTTTGGACACACTG
IL-10	Interleukin 10 (25325)	CTGCTCTTACTGGCTGGAGTGAAG	TGGGTCTGGCTGACTGGGAAG
IFN-γ	Interferon gamma (25712)	AACCCACAGATCCAGCACAAAGC	TACCCCAGAATCAGCACCGACTC
TPH1	Tryptophan Hydroxylase 1 (24848)	TGCGACATCAACCGAGAACAGC	CGGGCGAGTCCACAGAGAGG
IDO1	Indoleamine 2,3 dioxygenase 1 (66029)	AGCATCAAGACCCGAAAGCACTG	GATCCACGAAGTCACGCATCCTC
TH	tyrosine hydroxylase (25085)	TTGACCCTGATCTGGACCTGGAC	ATTGGTTCACCGTGCTTGTACTGG
TLR4	Toll-like receptor 4 (29260)	GACTCTGCCCTGCCACCATTTAC	TCCCAGCCAGATGCAAGAGAGG
NF-κB	nuclear factor kappa B subunit 1 (81736)	GGGATGGCTTCTATGAGGCTGAAC	CTTGCTCCAGGTCTCGCTTCTTC
NPY	Neuropeptide Y (24604)	GCCCGCCATGATGCTAGGTAAC	CCCTCAGCCAGAATGCCCAAAC
CRH	corticotropin releasing hormone (81648)	TGCCAAGGGAGGAGAAGAGAGC	GACAGAGCCACCAGCAGCATG
GPR41	free fatty acid receptor 3 (Ffar3) (365228)	TCTGCTCCTCTTCCTGCCATTCC	CGTTCTATGCTCACCGTCATCAGG
GPR43	free fatty acid receptor 2 (Ffar2) (292794)	TGCACCATCGTCATCATCGTTCAG	ACCAGGCACAGCTCCAGTCG
Olr59	olfactory receptor 59 (170816)	ATTCTCGCCCTCTTTTGGTTT	GCCGATTTGGACTGTTACTGT
Ocln	Occludin (83497)	CAACGGCAAAGTGAATGGCAAGAG	TCATCCACGGACAAGGTCAGAGG
ZO-1	Zonula occludens-1/tight junction protein 1 (Tjp1) (292994)	CGCAGCCAGTTCAAACAAAGTTCC	GCAACATCAGCAATCGGTCCAAAG
Muc2	Mucin-2, oligomeric mucus/gel-forming (24572)	TGTGAAGTTGCTGCTGATGAGTGG	AGGTCCTGGTGTCGTGATGGC
Muc3	Mucin-3 (687030)	TCCTCGCTGTGTTCTCCGTC	TTGTGCTCAAAGCCAATGTT
GAPDH	glyceraldehyde-3-phosphate dehydrogenase (24383)	GACATGCCGCCTGGAGAAAC	AGCCCAGGATGCCCTTTAGT

## Sheet: Behaviors and α-diversity
Table 3. The behaviors and alpha diversity in experiment one
Indicators		Wistar		WKY		P value
		Control	Restraint stress	Control	Restraint stress	Strain	Treatment	interaction effect
Behaviors
Forced swimming test	Immobility time (s) *	32.25±5.45	33.25±5.16	113.06±4.73	135.19±5.93	<0.0001	0.3655	0.4738
	Climbing time (s) *	95.75±11.42	77.31±11.99	20.56±3.50	11.13±3.61	<0.0001	0.2582	0.763
Open field test	Total distance (m) *	11.65±0.94	10.41±0.69	5.53±0.55	4.14±0.65	<0.0001	0.0799	0.9158
	Mean speed (m/s) *	0.038±0.003	0.034±0.002	0.018±0.002	0.014±0.002	<0.0001	0.0773	0.937
Bacteria alpha diversity	Chao1 estimator *	221.70±16.12	280.69±21.56	233.29±24.92	263.59±10.25	0.0074	0.9399	0.8505
	Faith’s phylogenetic diversity *	15.94±0.71	18.21±0.82	15.96±0.92	18.06±0.43	0.0037	0.8505	0.9399
	Shannon index *	4.35±0.24	5.46±0.20	5.19±0.34	5.47±0.14	0.0093	0.1632	0.2
	Simpson index *	0.843±0.028	0.938±0.008	0.923±0.018	0.94±0.008	0.0195	0.0973	0.1317
Fungi alpha diversity	Chao1 estimator	62.88±3.37	63.13±3.68	66.75±3.74	57.63±2.50	0.1923	0.2815	0.186
	Faith’s phylogenetic diversity	2.31±0.35	1.72±0.08	2.31±0.26	1.91±0.21	0.1632	0.451	0.6242
	Shannon index *	3.91±0.07	3.47±0.10	3.96±1.11	3.58±0.05	0.0014	0.6242	0.2913
	Simpson index *	0.879±0.008	0.805±0.019	0.852±0.018	0.836±0.007	0.0012	0.8505	0.2136
* strain effect p<0.05; # treatment effect p<0.05.
darkblue; Two-way ANOVA and Tukey HSD test. black; ScheirerRayHare test and Dunn’s Test adjusted by Benjamini–Hochberg method
Table 4. The behaviors and alpha diversity in experiment two
Indicators		Wistar		WKY		P value
		Control	NS8	Control	NS8	Strain	Treatment	interaction effect
Behaviors
Forced swimming test	Immobility time (s) *#	27.06±4.23	16.75±3.50	55.88±6.26	32.19±5.89	0.0024	0.0078	0.4736
	Climbing time (s) *	80.44±17.91	100.81±14.42	34.50±4.67	48.25±3.54	<0.0001	0.1176	0.9099
Sucrose prefrence test	Sucrose prefrence (%) *	91.29±2.55	94.26±1.67	84.49±4.95	91.17±1.16	0.0348	0.1051	0.6241
Open field test	Total distance (m) *	11.29±0.66	12.79±1.28	6.80±0.45	5.71±0.89	<0.0001	0.819	0.151
	Mean speed (m/s) *	0.037±0.002	0.042±0.004	0.022±0.001	0.019±0.003	<0.0001	0.797	0.164
Bacteria alpha diversity	Chao1 estimator *	245.93±24.87	243.09±20.34	346.50±7.59	348.36±14.22	0.0003	0.9249	0.985
	Faith’s phylogenetic diversity *	16.11±1.00	16.63±0.70	20.20±0.19	20.36±0.60	0.0006	0.9399	0.7919
	Shannon index *	5.36±0.35	5.05±0.26	6.42±0.15	6.24±0.14	0.0003	0.3461	0.8505
	Simpson index *	0.915±0.022	0.910±0.012	0.969±0.005	0.959±0.005	0.0005	0.1748	0.8802
Fungi alpha diversity	Chao1 estimator *	54.00±3.18	55.38±4.72	44.13±3.46	43.63±2.34	0.0036	0.8798	0.8798
	Faith’s phylogenetic diversity *	2.46±0.24	2.59±0.27	2.01±0.09	2.05±0.19	0.0215	1	0.8505
	Shannon index *	2.25±0.07	2.33±0.08	2.02±0.09	2.10±0.08	0.0093	0.407	0.9699
	Simpson index	0.597±0.009	0.602±0.018	0.576±0.021	0.611±0.015	0.8211	0.3089	0.6242
* strain effect p<0.05; # treatment effect p<0.05.
darkblue; Two-way ANOVA and Tukey HSD test. black; ScheirerRayHare test and Dunn’s Test adjusted by Benjamini–Hochberg method

## Sheet: Physiological indicators
Table 5. The brain-gut axis indicators in experiment two
Biochemical indicators	Wistar		WKY		P value
	Control	NS8	Control	NS8	Strain	Treatment	interaction effect
Hippocampus
5-HT (ng/g)	31.94±4.42	43.48±6.87	26.48±4.77	29.58±4.81	0.0789	0.1784	0.433
5-HIAA (ng/g) #	760.93±41.76	938.11±90.14	777.63±33.36	867.15±29.55	1	0.0104	0.5978
DA (ng/g) #	9.22±0.90	10.83±0.95	8.52±0.68	10.63±0.53	0.5688	0.0249	0.7548
NE (ng/g)	15.90±5.19	13.58±3.07	20.87±4.05	19.70±4.58	0.1632	0.6785	0.9399
BDNF (ng/g) #	52.87±8.50	68.53±6.42	51.46±4.48	70.28±7.26	0.9747	0.0177	0.8122
GR (ng/g) #	1.44±0.15	1.76±0.15	1.31±0.14	1.91±0.18	0.9638	0.0063	0.3768
CRH (ng/g) #	19.90±0.70	18.52±0.81	21.53±0.66	19.57±0.45	0.054	0.0183	0.6608
IDO (ng/g) #	4.02±0.46	5.91±0.91	3.71±0.40	4.95±0.82	0.3461	0.0143	0.763
TPH2 (ng/g)	5.58±0.40	6.73±0.58	5.27±0.39	5.46±0.39	0.1316	0.1178	0.4623
TH (ng/g)	12.89±1.07	15.03±1.60	13.12±0.80	13.22±1.12	0.91	0.4287	0.2582
IL-17 (ng/g)	15.75±1.78	17.55±2.27	14.21±1.27	15.75±2.19	0.6488	0.6439	0.625
IL-10 (pg/g)	634.06±85.38	733.13±79.81	600.75±55.43	636.90±69.18	0.429	0.2645	0.5105
hypothalamus
5-HT (ng/g)	59.54±9.75	61.66±8.78	46.70±4.96	57.60±8.25	0.3461	0.6512	0.5719
DA(ng/g)	18.88±1.87	17.16±1.84	16.93±2.48	16.39±2.47	0.549	0.594	0.79
NE(ng/g)	2.64±0.82	2.17±0.30	4.15±0.83	2.03±0.22	0.1507	0.1663	0.0861
BDNF(ng/g)	64.57±10.88	68.96±14.62	57.64±7.23	61.35±5.64	0.9399	0.8505	0.91
GR(ng/g)	3.14±0.38	2.73±0.35	2.74±0.27	2.61±0.12	0.8801	0.1747	0.8801
CRH（ng/g)	36.86±1.53	35.03±1.75	35.25±2.63	33.89±2.51	0.528	0.467	0.913
CORT（ng/g)	10.07±1.21	13.02±2.00	9.57±1.09	11.02±1.77	0.43	0.17	0.635
Serum
5-HT (ng/mL)	264.94±65.97	609.78±183.61	340.15±76.44	398.09±121.76	1	0.336	0.3174
5-HIAA (ng/mL)	108.23±4.15	113.38±10.38	115.50±7.53	108.77±5.51	0.856	0.914	0.421
NE (pg/mL) *	119.89±3.76	113.68±1.78	99.40±4.90	95.23±6.22	0.0002	0.3655	0.6509
E (pg/mL)	117.19±3.36	114.87±2.09	109.34±5.37	110.35±4.63	0.5587	0.9249	0.8209
CORT (ng/mL) *	320.07±10.77	326.92±7.87	263.23±7.28	259.41±5.04	<0.0001	0.8521	0.51
ACTH (pg/mL)*	55.97±1.18	56.58±0.64	45.44±1.84	43.42±2.39	<0.0001	0.895	0.5716
LPS (pg/mL)	58.44±12.87	67.77±16.19	135.86±19.77	152.45±25.66	0.0002	0.498	0.8489
IL-17 (pg/ml)	206.60±81.91	173.11±29.12	111.34±38.55	112.29±21.60	0.2503	0.4397	0.7344
IL-10 (pg/mL)	33.08±0.89	32.32±1.11	36.00±1.85	36.89±2.11	0.0701	0.7916	0.428
TGF-β (pg/mL) *	158.74±3.21	158.46±4.00	139.82±6.27	138.17±5.32	0.0011	0.7196	0.8207
TNF-α (pg/mL) *	160.71±4.92	162.77±5.08	169.90±6.03	171.39±5.09	0.0417	0.4284	0.9399
IL-6 (pg/mL) *	82.80±1.68	87.39±2.19	95.43±4.30	98.27±5.87	0.0203	0.4392	0.3455
IL-1β (pg/mL) *	40.05±0.65	39.47±1.61	44.25±1.48	45.92±1.92	0.0014	0.8652	0.9399
IFN-γ (pg/mL)	307.40±9.03	299.70±11.27	336.97±18.75	346.05±21.37	0.0701	0.7916	0.428
ileum
5-HT (ng/g)	30.04±7.45	32.28±5.33	20.75±1.56	20.75±3.39	0.1051	0.6511	0.474
5-HIAA (ng/g)	405.84±15.26	383.91±14.00	419.01±13.50	400.39±12.69	0.295	0.156	0.906
DA (ng/g)	37.27±5.43	57.62±8.84	47.63±6.82	57.09±7.93	0.51	0.0527	0.466
NE (ng/g)	1.11±0.41	1.90±0.53	1.23±0.12	0.89±0.12	0.7063	0.8802	0.0418
HVA (ng/g)	90.13±31.61	119.96±21.13	92.84±16.51	67.85±5.97	0.4975	0.4975	0.0501
GABA (nmol/g) *	89.57±1.55	92.28±2.89	80.42±3.06	80.26±2.26	0.0002	0.6148	0.573
GLU (ug/g) #	464.34±14.44	477.67±15.45	443.32±12.42	472.66±17.87	0.2742	0.0437	0.4855
SP (pg/g)	547.40±108.28	554.83±115.25	680.56±166.89	800.67±184.00	0.209	0.668	0.705
TH	1.61±0.57	1.28±0.34	1.29±0.34	0.86±0.23	0.5719	0.6242	0.3657
NPY #	1.17±0.16	0.56±0.16	1.05±0.13	1.07±0.11	0.1849	0.0453	0.0325
CRH	2.69±1.11	1.95±0.63	1.74±0.62	0.89±0.45	0.2278	0.3461	0.3461
TPH1 *	0.67±0.06	0.74±0.12	1.03±0.09	0.98±0.08	0.0027	0.9462	0.5312
IDO1	2.57±1.24	6.13±2.83	2.88±1.55	1.97±1.04	0.763	1	0.9399
TNF-α	1.78±0.43	2.69±1.05	1.43±0.48	0.94±0.19	0.0704	0.7919	0.5719
IFN-γ *	2.36±0.87	3.26±0.73	1.56±0.52	0.86±0.35	0.0215	0.8515	0.2278
IL-1β	1.55±0.38	1.36±0.21	1.33±0.41	0.96±0.20	0.0648	1	0.6784
IL-6	2.45±0.93	1.61±0.45	1.66±0.60	0.93±0.38	0.407	0.386	0.4288
IL-10 *	3.42±1.22	3.95±0.68	1.72±0.66	1.08±0.38	0.0143	0.9699	0.407
IL-17	2.60±1.03	2.23±0.49	1.74±0.62	0.89±0.35	0.1416	0.5465	0.3089
NF-κB	1.06±0.13	0.89±0.12	1.02±0.09	0.98±0.04	0.7774	0.7487	0.763
TLR4	0.90±0.07	0.96±0.09	1.04±0.10	0.91±0.09	0.386	0.5719	0.2001
ZO-1	1.14±0.09	0.98±0.13	1.03±0.09	1.11±0.06	0.911	0.697	0.2
Occludin	1.16±0.06	0.93±0.13	1.03±0.09	1.03±0.04	0.3178	0.3178	0.4069
Muc-2	1.17±0.11	0.98±0.17	1.05±0.13	1.17±0.15	0.799	0.814	0.293
Muc-3	1.00±0.11	0.93±0.21	1.06±0.13	1.20±0.11	0.258	0.813	0.467
GPR41 *	2.10±0.49	2.19±0.61	1.06±0.14	0.89±0.13	0.0018	0.5718	0.451
GPR43 *	1.48±0.22	1.55±0.40	1.11±0.20	0.90±0.07	0.0215	0.5095	0.7774
Olr59	1.50±0.43	2.78±1.54	1.21±0.29	0.92±0.21	0.2913	0.91	0.3461
Colon
5-HT (ng/g) *	34.53±2.73	37.35±2.93	29.18±2.17	26.84±1.87	0.0032	0.924	0.3034
5-HIAA (ng/g) #	382.41±6.74	397.89±6.48	378.62±8.29	404.95±6.80	0.8203	0.0065	0.4522
DA (ng/g)	122.97±12.83	109.26±9.01	103.14±4.97	105.71±9.41	0.227	0.561	0.398
NE (ng/g) *	14.39±6.09	11.49±3.73	28.16±6.61	25.63±10.81	0.0116	0.5465	0.386
HVA (ng/g)	117.32±42.74	138.74±30.23	171.18±17.89	87.98±14.25	0.3657	0.346	0.0143
GABA (nmol/g) *	90.49±2.75	83.42±1.50	79.51±2.82	80.86±3.20	0.0161	0.2885	0.1225
GLU (ug/g)	518.99±16.79	514.54±12.54	513.65±14.36	515.26±21.78	0.892	0.933	0.858
SP (pg/g) *	3.08±0.32	2.82±0.27	2.09±0.17	2.65±0.25	0.0418	0.4739	0.1416
TH *	2.44±0.62	1.78±0.26	1.17±0.27	1.17±0.28	0.0159	0.8505	0.7919
NPY *	3.41±0.83	3.13±0.50	1.33±0.49	1.40±0.41	0.001	0.7919	0.8802
CRH *	3.83±0.43	3.24±0.49	1.10±0.18	0.94±0.15	<0.0001	0.5127	0.8505
TPH1 *	1.76±0.18	1.71±0.16	1.07±0.13	1.07±0.15	0.0003	0.8722	0.8714
IDO1*	2.64±0.27	3.65±1.15	1.73±0.90	0.72±0.12	<0.0001	0.6511	0.386
TNF-α *	8.16±2.92	4.99±0.90	1.18±0.31	1.79±1.10	0.0002	0.7919	0.6241
IFN-γ *	27.59±9.00	14.43±3.63	1.64±0.50	1.64±0.36	0.0007	0.9399	0.8802
IL-1β *	4.32±1.36	2.74±0.30	1.11±0.21	1.22±0.33	<0.0001	0.8358	0.7203
IL-6 *	16.72±5.20	9.80±2.09	1.16±0.21	1.45±0.42	0.0002	0.9399	0.9699
IL-10 *	12.95±4.39	6.42±1.51	1.08±0.16	1.57±0.74	0.0012	0.9699	0.9699
IL-17 *	41.52±13.13	20.59±5.77	1.41±0.37	1.72±0.39	0.0005	0.91	0.7345
NF-κB *	1.82±0.27	1.42±0.16	1.06±0.11	1.07±0.12	0.0143	0.5217	0.763
TLR4 *	2.70±1.08	1.90±0.26	1.29±0.34	0.97±0.12	0.002	0.5978	0.7063
ZO-1	1.32±0.16	1.24±0.08	1.07±0.12	1.09±0.13	0.13	0.822	0.696
Occludin *	2.73±0.47	2.71±0.29	1.05±0.12	1.03±0.10	<0.0001	0.91	0.7919
Muc-2	0.88±0.18	1.01±0.27	1.17±0.25	1.13±0.19	0.1521	0.7919	0.9699
Muc-3 *	1.34±0.26	2.00±0.35	1.10±0.16	1.07±0.13	0.0418	0.2912	0.2278
GPR41 *	10.76±2.87	7.91±1.92	1.18±0.27	0.86±0.07	<0.0001	0.6511	0.91
GPR43 *	4.23±0.78	2.82±0.39	1.18±0.27	1.00±0.19	<0.0001	0.5465	0.8211
Olr59 *	4.94±0.75	4.78±0.64	1.12±0.17	0.97±0.14	<0.0001	0.7345	0.8211
* strain effect p<0.05; # treatment effect p<0.05.
darkblue; Two-way ANOVA and Tukey HSD test. black; ScheirerRayHare test and Dunn’s Test adjusted by Benjamini–Hochberg method
